# Supplementary material for: YAP regulates PD-L1 expression in human NSCLC cells
Source: PubMed Central journal article supplement (PMC5777715; doi:10.18632/oncotarget.23051), 2017-12-09
Supplement: oncotarget-08-114576-s001.pdf [file oncotarget-08-114576-s001.pdf]

## YAP regulates PD-L1 expression in human NSCLC cells

### SUPPLEMENTARY MATERIALS

**Supplementary Table 1: Immunohistochemistry findings and basic information from human non-small cell lung cancer samples.** See Supplementary\_Table\_1

**Supplementary Table 2: AP IHC comparison in patients with different clinical characteristics**

| Clinical characteristics | YAP               |                | X <sup>2</sup> | P value |
|--------------------------|-------------------|----------------|----------------|---------|
|                          | Positive (++/+++) | Negative (-/+) |                |         |
| <b>TNM stage*</b>        |                   |                | 1.706          | 0.653   |
| I                        | 30                | 18             |                |         |
| II                       | 17                | 10             |                |         |
| III                      | 12                | 4              |                |         |
| IV                       | 2                 | 0              |                |         |
| <b>Histopathology</b>    |                   |                | 0.027          | 0.869   |
| Squamous                 | 33                | 21             |                |         |
| Non-squamous             | 55                | 33             |                |         |

\*In 142 patients, there were no available TNM in 45 cases, 97 cases can be analyzed.

**Supplementary Table 3: PD-L1 IHC comparison in patients with different clinical characteristics**

| Clinical characteristics | PD-L1            |                | X <sup>2</sup> | P value |
|--------------------------|------------------|----------------|----------------|---------|
|                          | Positive (+/+++) | Negative (-/+) |                |         |
| <b>TNM stage*</b>        |                  |                | 0.302          | 0.96    |
| I                        | 20               | 32             |                |         |
| II                       | 10               | 17             |                |         |
| III                      | 7                | 9              |                |         |
| IV                       | 1                | 1              |                |         |
| <b>Histopathology</b>    |                  |                | 2.935          | 0.087   |
| Squamous                 | 15               | 39             |                |         |
| Non-squamous             | 37               | 51             |                |         |

\*In 142 patients, there were no available TNM in 45 cases, 97 cases can be analyzed.

**Supplementary Table 4: Statistical analysis of YAP mRNA level percentage by control**

| Cell line | mean ± SD<br>(percentage by control) | Statistical analysis                       |
|-----------|--------------------------------------|--------------------------------------------|
| LP-9      | 1.00 ± 0.04                          | @@, \$\$\$, \$\$\$, &&&, ^^, □□□, ###, +++ |
| H2030     | 3.59 ± 0.68                          | \$\$, &&&, ^^, □□□, ###, +++               |
| A549      | 4.14 ± 0.85                          | \$\$, &&&, ^^, □□□, ###, +++               |
| H2170     | 6.27 ± 0.78                          | □□□, ###, +++                              |
| H1975     | 6.89 ± 1.34                          | □□□, ###, +++                              |
| PC9       | 7.06 ± 0.45                          | □□□, ###, +++                              |
| H460      | 10.16 ± 1.27                         | ###, +++                                   |
| SKLU-1    | 19.57 ± 0.46                         |                                            |
| H1299     | 20.31 ± 1.27                         |                                            |

|            |            |              |                 |
|------------|------------|--------------|-----------------|
| VS LP-9:   | *P < 0.05  | **P < 0.01   | ***P < 0.001    |
| VS H2030:  | @P < 0.05  | @@P < 0.01   | @@@P < 0.001    |
| VS A549:   | §P < 0.05  | §§P < 0.01   | §§§P < 0.001    |
| VS H2170:  | \$P < 0.05 | \$\$P < 0.01 | \$\$\$P < 0.001 |
| VS H1975:  | &P < 0.05  | &&P < 0.01   | &&&P < 0.001    |
| VS PC9:    | ^P < 0.05  | ^^P < 0.01   | ^^^P < 0.001    |
| VS H460:   | □P < 0.05  | □□P < 0.01   | □□□P < 0.001    |
| VS SKLU-1: | #P < 0.05  | ##P < 0.01   | ###P < 0.001    |
| VS H1299:  | +P < 0.05  | ++P < 0.01   | +++P < 0.001    |

**Supplementary Table 5: Statistical analysis of PD-L1 mRNA level percentage by control**

| Cell line | mean ± SD<br>(percentage by control) | Statistical analysis |
|-----------|--------------------------------------|----------------------|
| LP-9      | 1.00 ± 0.19                          | ααα, ##, ++          |
| H2030     | 0.44 ± 0.13                          | \$\$, ααα, ##, +++   |
| A549      | 0.61 ± 0.09                          | \$, αα, ##, +++      |
| H2170     | 1.86 ± 0.17                          | &, ^, ααα, #, +      |
| H1975     | 0.79 ± 0.01                          | ^^, αα, #, ++        |
| PC9       | 0.47 ± 0.02                          | αα, #, ++            |
| H460      | 8.39 ± 0.35                          | ###, ++              |
| SKLU-1    | 3.21 ± 0.22                          |                      |
| H1299     | 3.05 ± 0.11                          |                      |

|            |                    |                      |                         |
|------------|--------------------|----------------------|-------------------------|
| VS LP-9:   | * <i>P</i> < 0.05  | ** <i>P</i> < 0.01   | *** <i>P</i> < 0.001    |
| VS H2030:  | @ <i>P</i> < 0.05  | @@ <i>P</i> < 0.01   | @@@ <i>P</i> < 0.001    |
| VS A549:   | § <i>P</i> < 0.05  | §§ <i>P</i> < 0.01   | §§§ <i>P</i> < 0.001    |
| VS H2170:  | \$ <i>P</i> < 0.05 | \$\$ <i>P</i> < 0.01 | \$\$\$ <i>P</i> < 0.001 |
| VS H1975:  | & <i>P</i> < 0.05  | && <i>P</i> < 0.01   | &&& <i>P</i> < 0.001    |
| VS PC9:    | ^ <i>P</i> < 0.05  | ^^ <i>P</i> < 0.01   | ^^^ <i>P</i> < 0.001    |
| VS H460:   | α <i>P</i> < 0.05  | αα <i>P</i> < 0.01   | ααα <i>P</i> < 0.001    |
| VS SKLU-1: | # <i>P</i> < 0.05  | ## <i>P</i> < 0.01   | ### <i>P</i> < 0.001    |
| VS H1299:  | + <i>P</i> < 0.05  | ++ <i>P</i> < 0.01   | +++ <i>P</i> < 0.001    |

**Supplemental Table 6: Statistical analysis of GTIIC reporter activity (fold)**

| Cell line | mean ± SD<br>(percentage by control) | Statistical analysis                 |
|-----------|--------------------------------------|--------------------------------------|
| LP-9      | 0.90 ± 0.01                          | @@@, §§§, \$\$, &&&, ^, ααα, ##, +++ |
| H2030     | 2.38 ± 0.07                          | §§§, \$, ^^, ααα, ##, +++            |
| A549      | 0.71 ± 0.03                          | \$\$, &&&, αα, ^, ααα, ###, +++      |
| H2170     | 9.54 ± 1.23                          | &, ^, #, +                           |
| H1975     | 2.59 ± 0.06                          | ^^, ααα, ##, +++                     |
| PC9       | 0.84 ± 0.00                          | ααα, ###, +++                        |
| H460      | 10.80 ± 0.19                         | ###, +++                             |
| SKLU-1    | 4.05 ± 0.19                          |                                      |
| H1299     | 3.84 ± 0.14                          |                                      |

|            |                    |                      |                         |
|------------|--------------------|----------------------|-------------------------|
| VS LP-9:   | * <i>P</i> < 0.05  | ** <i>P</i> < 0.01   | *** <i>P</i> < 0.001    |
| VS H2030:  | @ <i>P</i> < 0.05  | @@ <i>P</i> < 0.01   | @@@ <i>P</i> < 0.001    |
| VS A549:   | § <i>P</i> < 0.05  | §§ <i>P</i> < 0.01   | §§§ <i>P</i> < 0.001    |
| VS H2170:  | \$ <i>P</i> < 0.05 | \$\$ <i>P</i> < 0.01 | \$\$\$ <i>P</i> < 0.001 |
| VS H1975:  | & <i>P</i> < 0.05  | && <i>P</i> < 0.01   | &&& <i>P</i> < 0.001    |
| VS PC9:    | ^ <i>P</i> < 0.05  | ^^ <i>P</i> < 0.01   | ^^^ <i>P</i> < 0.001    |
| VS H460:   | α <i>P</i> < 0.05  | αα <i>P</i> < 0.01   | ααα <i>P</i> < 0.001    |
| VS SKLU-1: | # <i>P</i> < 0.05  | ## <i>P</i> < 0.01   | ### <i>P</i> < 0.001    |
| VS H1299:  | + <i>P</i> < 0.05  | ++ <i>P</i> < 0.01   | +++ <i>P</i> < 0.001    |

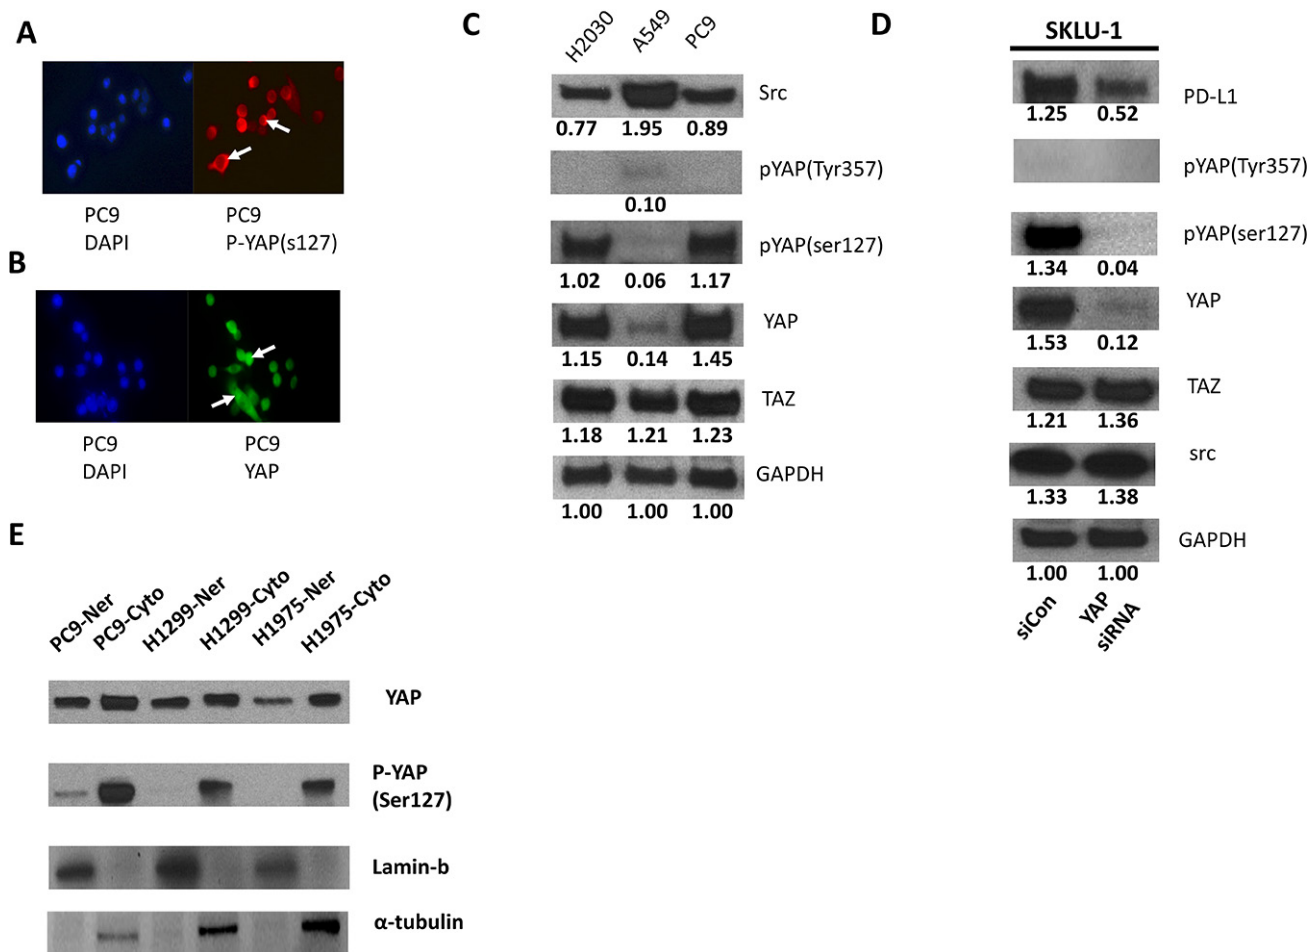

**Supplementary Figure 1: pYAP and YAP expression in NSCLC cell lines.** (A–B) Representative image showing expression of pYAP ( ser127) protein (A) and YAP protein (B) in PC9 cell line analyzed by immunofluorescence. YAP was stained in both nucleus and cytoplasm, whereas pYAP (ser127) was found in the cytoplasm. (C) Western blot was used to detect levels of YAP, pYAP (ser127), pYAP (Try357), Src and TAZ in H2030, A549 and PC9 cell lines. GAPDH was detected as a loading control. Band intensity was analyzed with ImageJ software and normalized with the intensity of the GAPDH band. (D) Western blot analysis of PD-L1, YAP, pYAP (ser127), pYAP (Try357), Src and TAZ in SKLU-1 cell line transfected with YAP siRNA or control siRNA. GAPDH was detected as a loading control. Band intensity was analyzed with ImageJ software and normalized with the intensity of the GAPDH band. (E) Western Blot analysis YAP, pYAP (ser127) in nucleus and cytoplasm of PC9, H1975 and H1299 cell lines. Lamin-b and α-tubulin were detected as a loading control.
